# Supplementary material for: Substrate promiscuity of key resistance P450s confers clothianidin resistance whilst increasing chlorfenapyr potency in malaria vectors
Source: Research Square preprint supplement (doi:10.21203/rs.3.rs-3865779/v1), 2024-01-22
Supplement: Supplementary file 1 [file 0a2dfd90b1f7c9920ab439e3.docx]

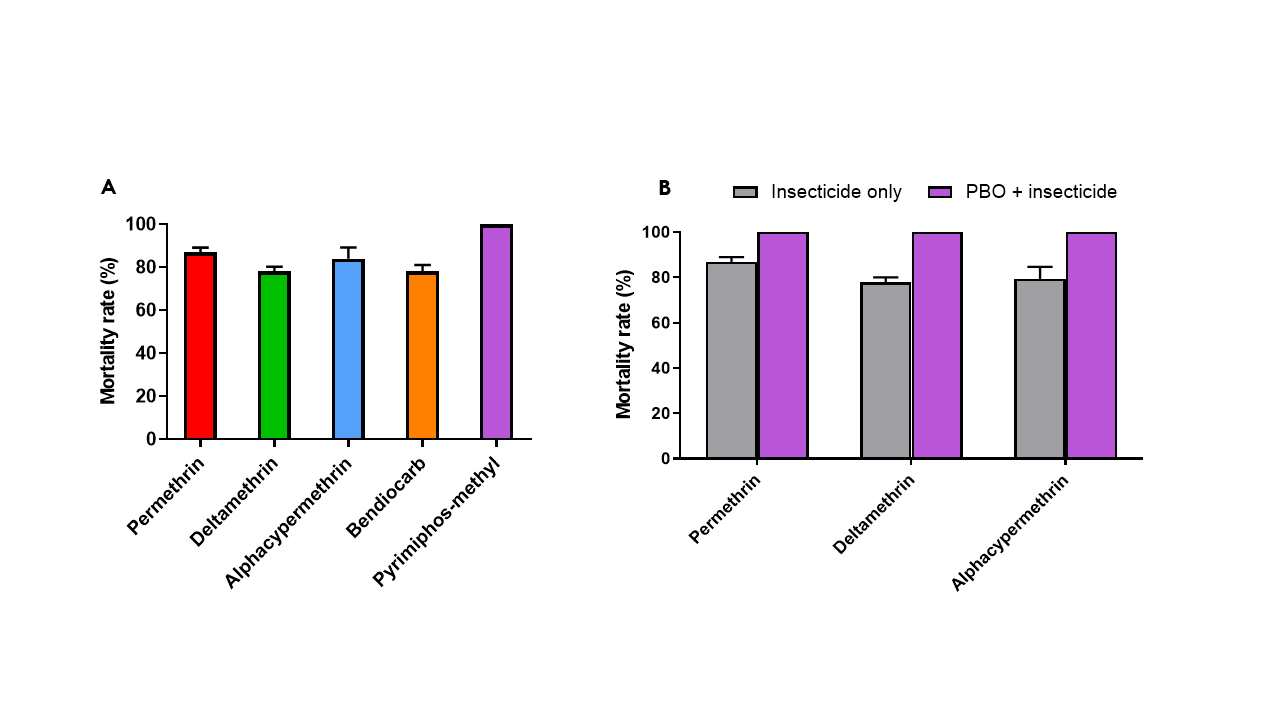


**Figure S1: Susceptibility profile of the hybrid strain FG/FZ F3 to the four main classes of insecticides recommended by WHO:** A) Mortality rate after exposure to pyrethroids (permethrin, deltamethrin and alpha-cypermethrin), carbamate (bendiocarb) and organophosphate (pirimiphos-methyl) following 60-min exposure; B) PBO synergist assays with pyrethroids; Data are shown as mean ± SEM.


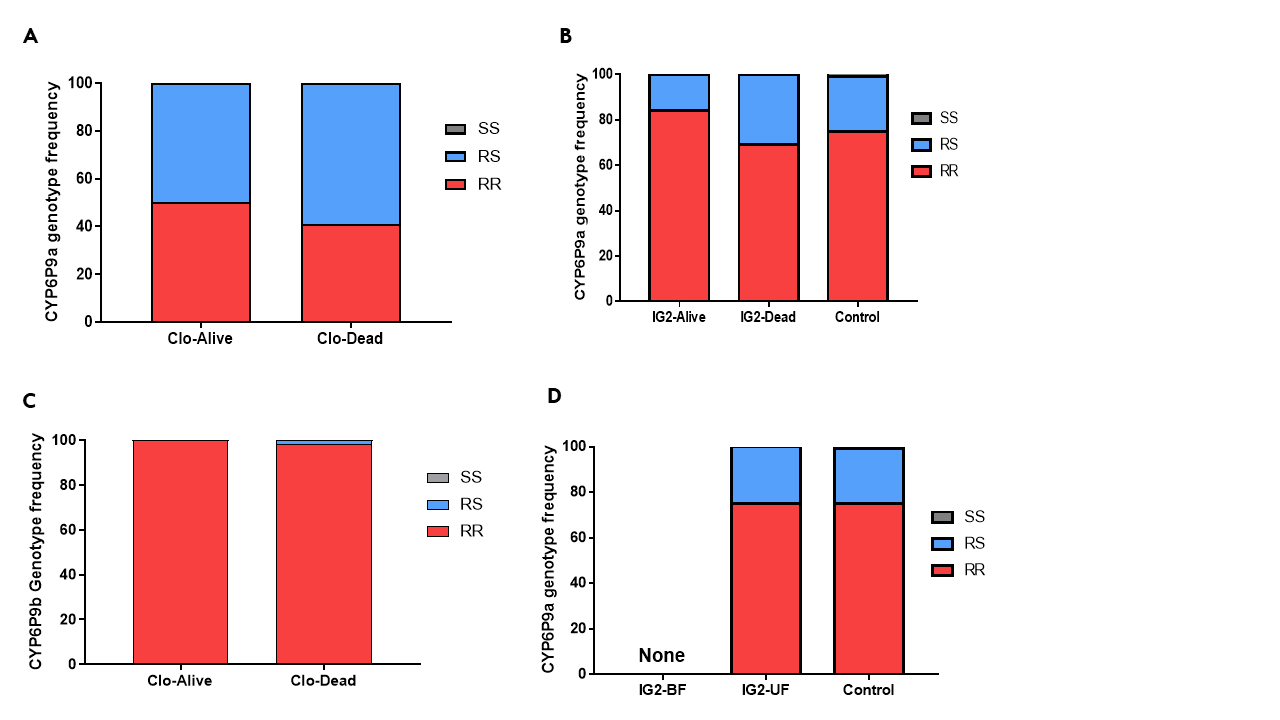


**Figure S2: Impact of *CYP6P9a and CYP6P9b* on the ability of field *An. funestus* from Malawi to survive clothianidin and chlorfenapyr exposure.** Genotype distribution of CYP6P9a (A) and CYP6P9b (B) between alive and dead after exposure to clothianidin. Genotype distribution of CYP6P9b between dead and alive (A), and blood-fed/unfed after exposure to the CFP-based net IG2 in tunnel test.


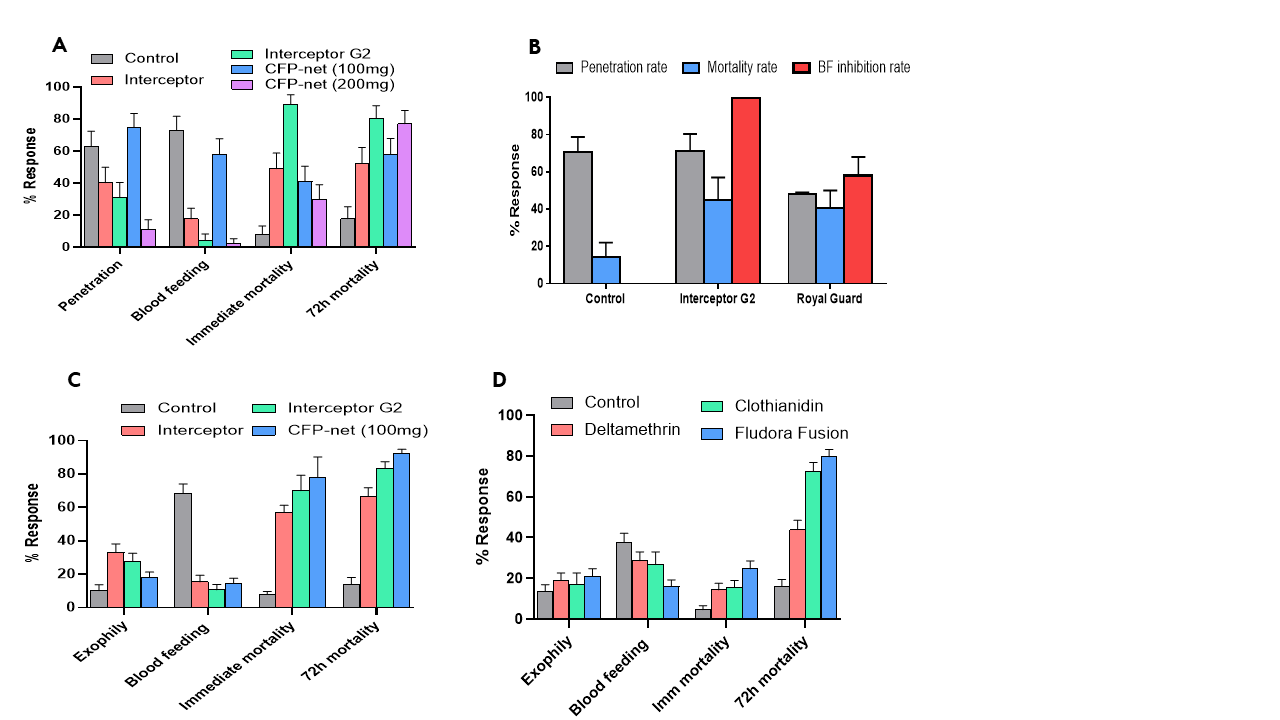


**Figure S3: Efficacy of chlorfenapyr and clothianidin-based control tools against the hybrid strain FG/FZ in tunnel assays and experimental hut trials:** A) Efficacy of CFP-based nets compared to pyrethroid-only net in tunnel tests; B) Efficacy of CFP-based nets compared to pyrethroid-only nets in EHT; C) Efficacy of the CLTD-based IRS formulations compared to pyrethroid-only IRS product in EHT. Data are shown as mean ± 95% CI.


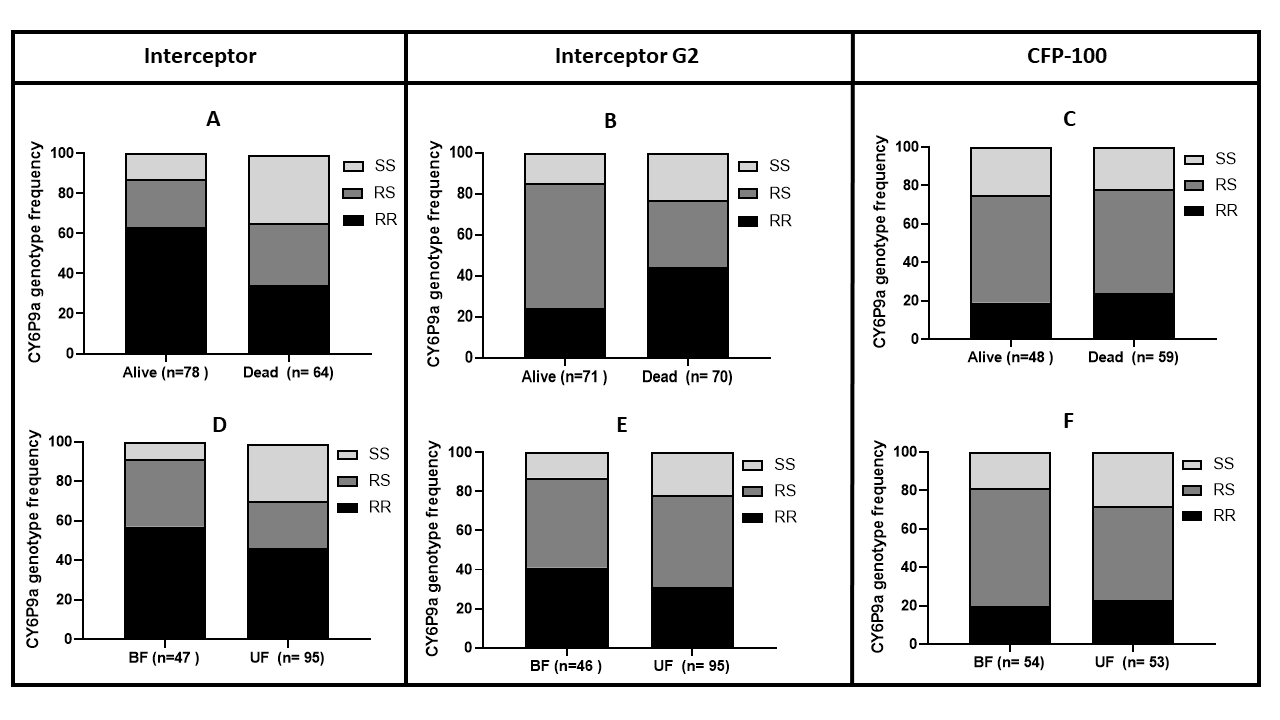


**Figure S4: Impact of the *CYP6P9a* on the efficacy of CFP-based nets on *An. funestus* in tunnel assays.** Genotype distribution between alive and dead after exposure to Interceptor (A), Interceptor G2 (B) and CFP-100 (C); Genotype distribution between blood fed and unfed after exposure to Interceptor (D), Interceptor G2 (E) and CFP-100 (F);


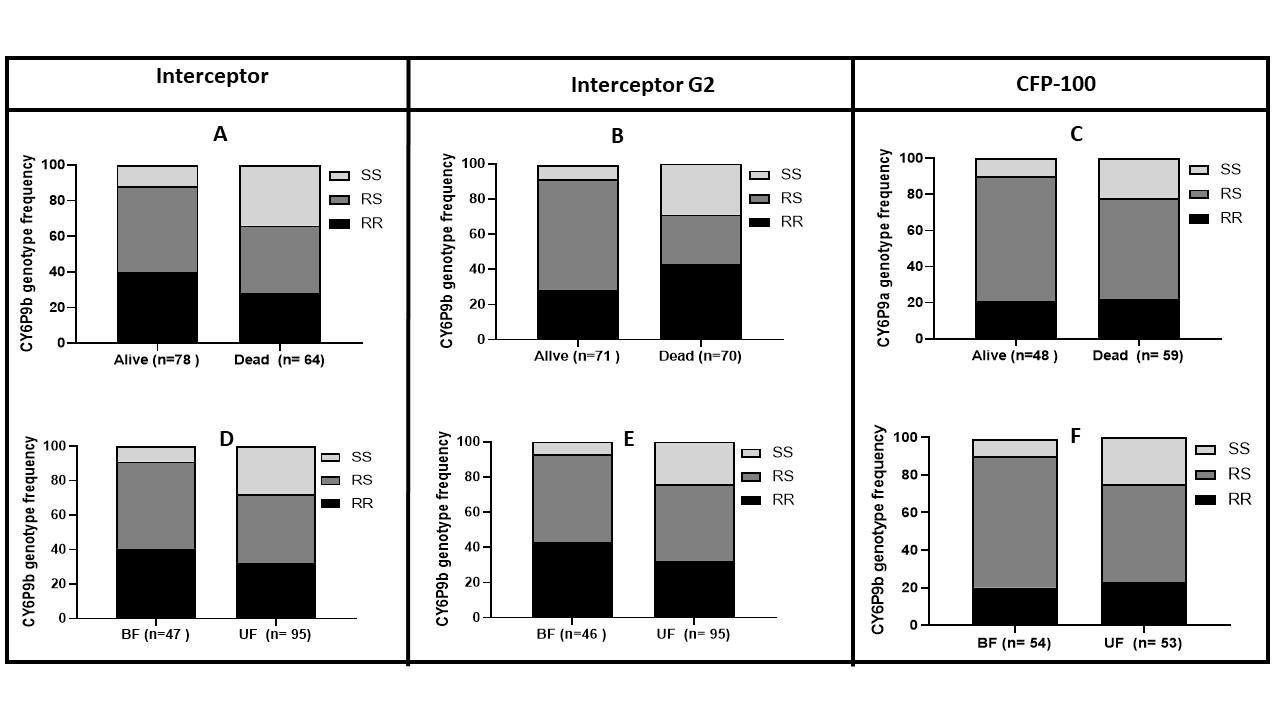


**Figure S5: Impact of the *CYP6P9b* on the efficacy of CFP-based nets on *An. funestus* in tunnel assays.** Genotype distribution between alive and dead after exposure to Interceptor (A), Interceptor G2 (B) and CFP-100 (C); Genotype distribution between blood fed and unfed after exposure to Interceptor (D), Interceptor G2 (E) and CFP-100 (F);


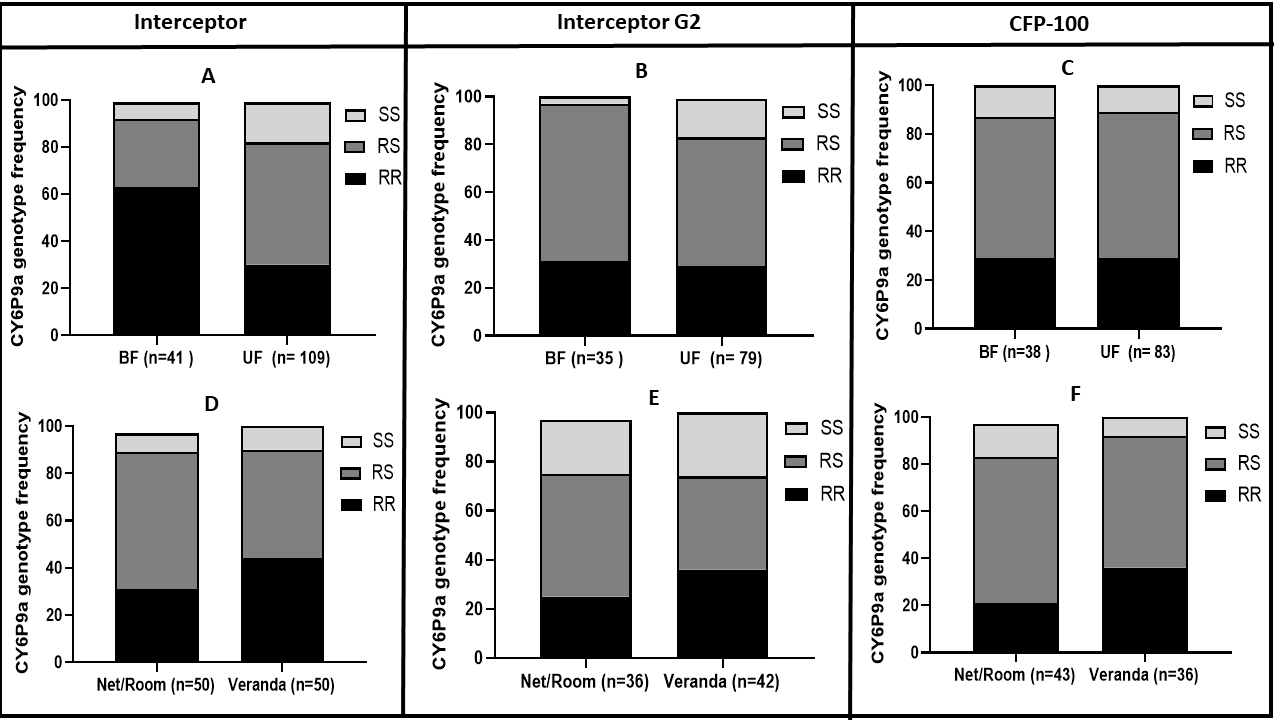


**Figure S6: Impact of the *CYP6P9a* on the efficacy of CFP-based nets on *An. funestus* in EHT.** Genotype distribution between blood-fed and unfed after exposure to Interceptor (A), Interceptor G2 (B) and CFP-100 (C); Genotype distribution between indoor (Net/Room) and outdoor (veranda) after exposure to Interceptor (D), Interceptor G2 (E) and CFP-100 (F).


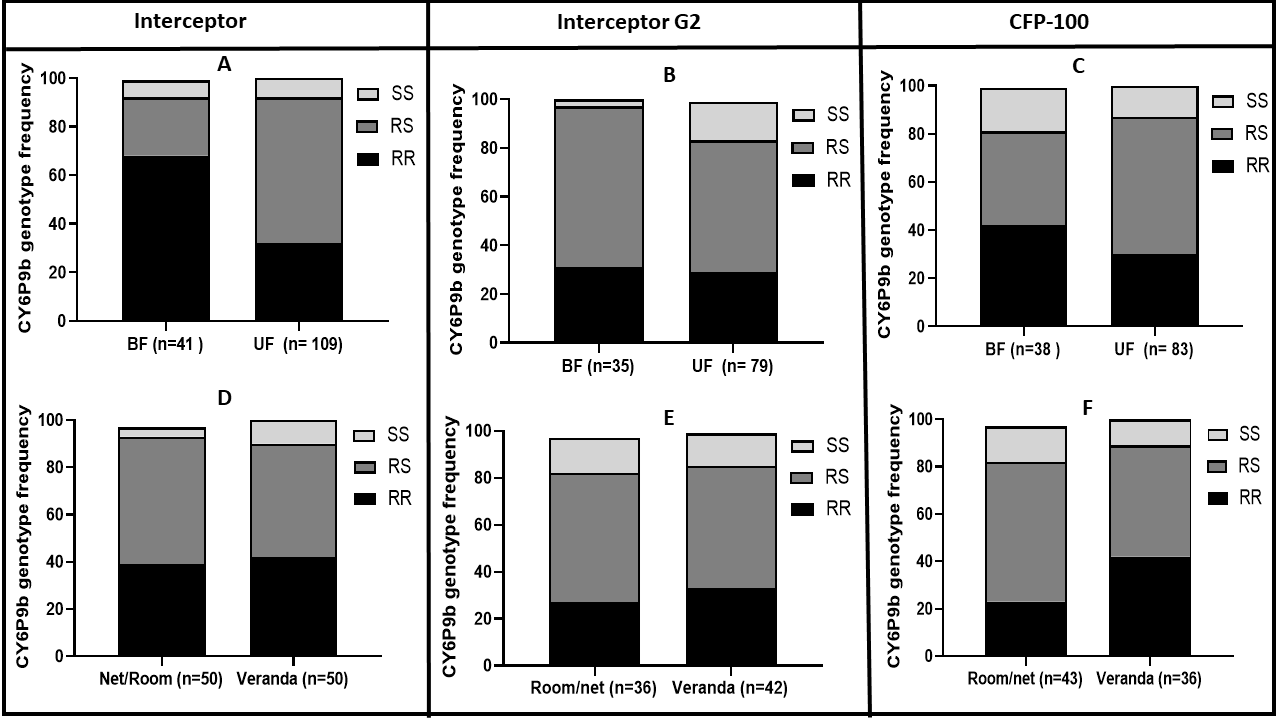


**Figure S7: Impact of the *CYP6P9b* on the efficacy of CFP-based nets on *An. funestus* in EHT.** Genotype distribution between blood-fed and unfed after exposure to Interceptor (A), Interceptor G2 (B) and CFP-100 (C); Genotype distribution between indoor (Net/Room) and outdoor (veranda) after exposure to Interceptor (D), Interceptor G2 (E) and CFP-100 (F).


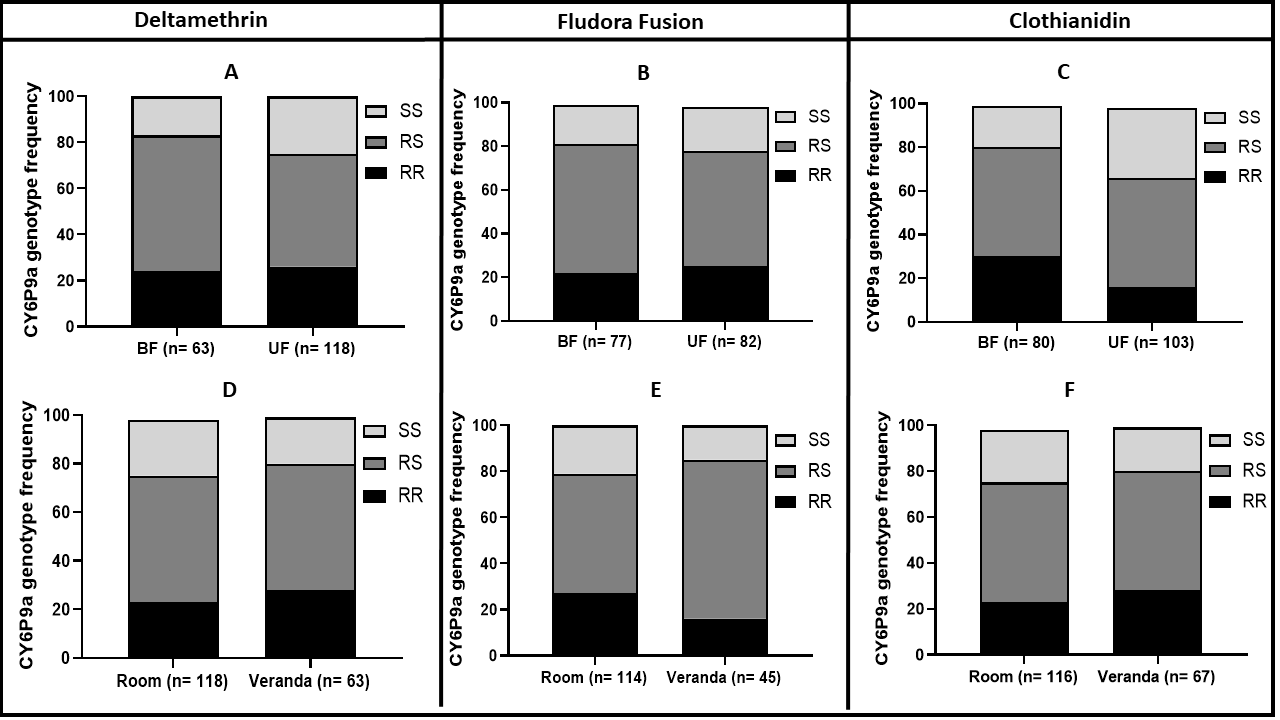


**Figure S8: Impact of the *CYP6P9a* on the efficacy of clothianidin-based IRS formulation on *An. funestus* in EHT.** Genotype distribution between blood-fed and unfed after exposure to deltamethrin (A), Fludora Fusion (B) and clothianidin (C); Genotype distribution between indoor (Room) and outdoor (veranda) after exposure to deltamethrin (D), Fludora Fusion (E) and clothianidin (F).


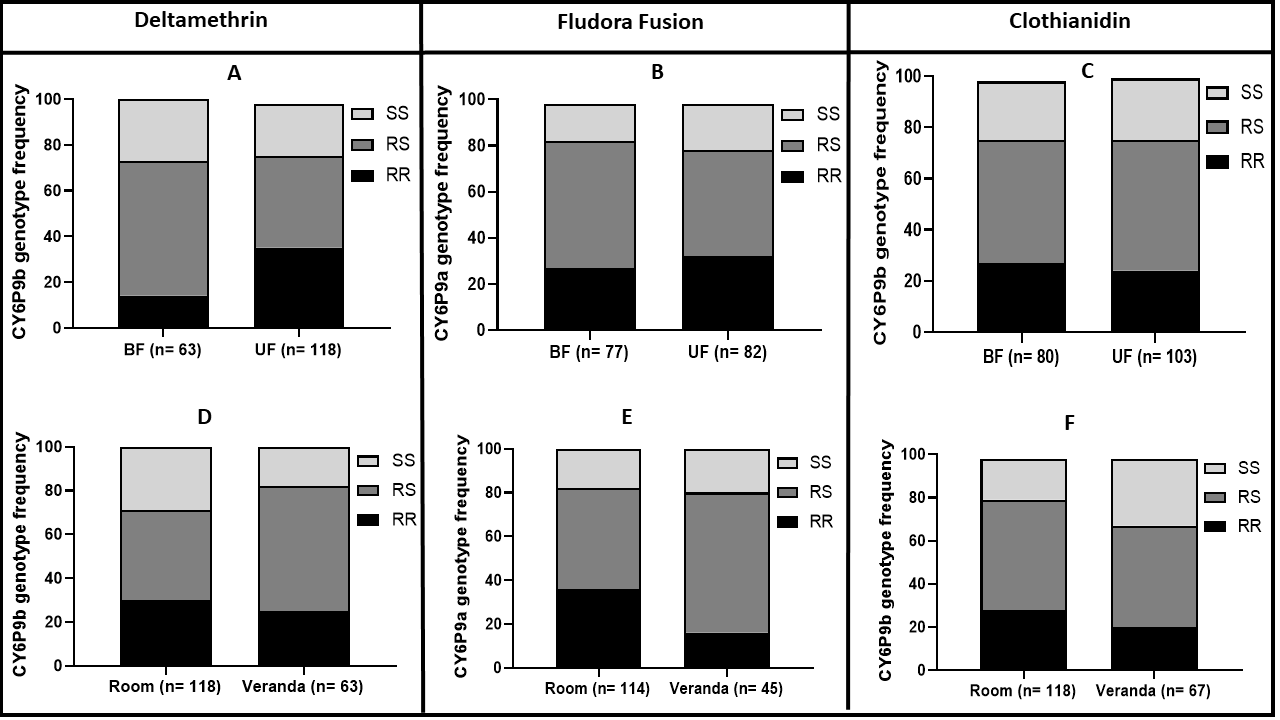


**Figure S9:** **Impact of the *CYP6P9b* on the efficacy of clothianidin-based IRS formulation on *An. funestus* in EHT.** Genotype distribution between blood-fed and unfed after exposure to deltamethrin (A), Fludora Fusion (B) and clothianidin (C); Genotype distribution between indoor (Room) and outdoor (veranda) after exposure to deltamethrin (D), Fludora Fusion (E) and clothianidin (F).

**Table S1*:*** Correlation between genotypes of the CYP6P9a/b and ability to survive exposure to CFP in CDC bottle assays

|  | **Odd-Ratio** | **Confidence interval** | ***P*-value** |
| --- | --- | --- | --- |
|  | **Genotypes at *CYP6P9a* locus** | | |
| **RR vs SS** | 0.1 | 0.06 - 0.3 | <0.0001 |
| **RS vs SS** | 0.7 | 0.3 - 1.7 | 0.7 |
| **RR vs RS** | 0.1 | 0.09 - 0.3 | <0.0001 |
| **R vs S** | 0.7 | 0.4 - 1.3 | 0.4 |
|  | **Genotypes at *CYP6P9b* locus** | | |
| **RR vs SS** | 0.2 | 0.1 - 0.5 | 0.0003 |
| **RS vs SS** | 0.7 | 0.3 -1.5 | 0.09 |
| **RR vs RS** | 0.3 | 0.2 - 0.7 | 0.002 |
| **R vs S** | 0.6 | 0.9 - 2.7 | 0.1 |

OR: odd-ratio; CI: confidence interval; RR: homozygote resistant; RS: heterozygote; SS: homozygote susceptible.

**Table S2:** Impact of CYP6P9a and b on the ability of mosquitoes to survive clothianidin exposure in CDC bottle assay

|  | **Odd-Ratio** | **Confidence interval** | ***P*-value** |
| --- | --- | --- | --- |
| **Genotypes at *CYP6P9a* locus** | | | |
| **RR vs SS** | 7.5 | 2.1-27.5 | 0.001 |
| **RS vs SS** | 3.5 | 1.1-11.5 | 0.02 |
| **RR vs RS** | 2.1 | 0.9-5.1 | 0.06 |
| **R vs S** | 2.2 | 1.2-3.8 | 0.005 |
| **Genotypes at *CYP6P9b* locus** | | | |
| **RR vs SS** | 7.1 | 1.9-26.1 | 0.002 |
| **RS vs SS** | 3 | 0.9-9.9 | 0.05 |
| **RR vs RS** | 2.4 | 0.9-5.6 | 0.04 |
| **R vs S** | 2.2 | 1.2-3.8 | 0.005 |

OR: odd-ratio; CI: confidence interval; RR: homozygote resistant; RS: heterozygote; SS: homozygote susceptible.

**Table S3:** Performance of clothianidin-based IRS against F3 hybrid FG/FZ *An. funestus* mosquitoes

| **Outcomes** | **Control** | **Deltamethrin**  **(25 mg/m2)** | **Clothianidin**  **(200 mg/m2)** | **Fludora® Fusion**  **(225 mg/m2)** |
| --- | --- | --- | --- | --- |
| **females caught** | 339 | 447 | 408 | 471 |
| **%Exophily**  **(95% CI)** | 13.67  (10.45-16.88) a | 19.02  (15.38-22.65) b | 17.16  (13.50-20.82) b | 21.02  (17.34-24.70) b |
| **%Blood fed**  **(95% CI)** | 37.59  (33.05-42.12) c | 28.64  (24.44-32.83) b | 26.72  (22.42-31.01) b | 15.92  (12.62-19.23) a |
| **% Immediate mortality (95% CI)** | 4.56  (2.61-6.51) a | 14.32  (11.07-17.56) b | 15.44  (11.93-18.95) b | 24.63  (20.74-28.52) c |
| **%Mortality (72 h)**  **(95% CI)** | 15.95  (12.52-19.37) a | 43.85  (39.25-48.45) b | 72.55  (68.22-76.88) c | 79.62  (75.98-83.26) c |

***Table S4:*** *Combined impact of CYP6P9a and CYP6P9b on the mortality and blood feeding of An. funestus after exposure to various nets in tunnel assays*

| **Interceptor** | | | | | | |
| --- | --- | --- | --- | --- | --- | --- |
|  | **Mortality** | | | **Blood feeding** | | |
|  | **OR** | **CI** | **P-value** | **OR** | **CI** | **P-value** |
| **RR/RR vs RS/RS** | 1.7 | 0.8-3.7 | 0.1 | 0.9 | 0.4-2 | >0.9 |
| **RR/RR vs SS/SS** | 8.06 | 2.7-20.7 | <0.0001 | 3.2 | 1.2-7.6 | 0.01 |
| **RR/RR vs SS/RR** | 0.6 | 0.1-2.8 | 0.6 | 5.3 | 0.7-66.7 | 0.1 |
| **RR/RR vs SS/RS** | 0.3 | 0.02-2.08 | 0.3 | 4 | 0.5-53.1 | 0.3 |
| **RS/RS vs SS/SS** | 4.6 | 1.6-12.1 | 0.004 | 3.3 | 1.2-8.2 | 0.01 |
| **RS/RS vs RS/SS** | 1.4 | 0.15-21.1 | >0.9 | 2.7 | 0.29-40.6 | 0.5 |
| **RS/RS vs RR/SS** | 7.1 | 0.8-86.4 | 0.08 | 0.1 | 0.01-1.2 | 0.1 |
| **Interceptor G2** | | | | | | |
|  | **OR** | **CI** | **P-value** | **OR** | **CI** | **P-value** |
| **RR/RR vs RS/RS** | 0.1 | 0.06-0.3 | <0.0001 | 1.6 | 0.7-3.3 | 0.2 |
| **RR/RR vs SS/SS** | 0.8 | 0.32.4 | >0.9 | 5.9 | 1.6-17.4 | 0.002 |
| **RR/RR vs SS/RR** | 0.2 | 0.01-5.6 | 0.4 | 1.1 | 0.05-23.2 | >0.9 |
| **RR/RR vs SS/RS** | 0.03 | 0.003-0.2 | 0.0006 | 0.1 | 0.01-1.002 | 0.07 |
| **RS/RS vs SS/SS** | 5.5 | 2.07-13.7 | 0.0004 | 3.6 | 1.1-10.7 | 0.02 |
| **RS/RS vs RS/SS** | 1.6 | 0.08-32.7 | >0.9 | 0.7 | 0.03-14.4 | >0.9 |
| **RS/RS vs RR/SS** | 0.1 | 0.01-1 | 0.1 | 0.9 | 0.1-4.6 | >0.9 |
| **CFP-100** | | | | | | |
|  | **OR** | **CI** | **P-value** | **OR** | **CI** | **P-value** |
| **RR/RR vs RS/RS** | 0.9 | 0.4-1.9 | 0.8 | 0.6 | 0.3-1.3 | 0.3 |
| **RR/RR vs SS/SS** | 1.7 | 0.6-4.7 | 0.3 | 2.5 | 0.8-7.01 | 0.1 |
| **RR/RR vs SS/RR** | 1.7 | 0.1-27.2 | >0.9 | 1.5 | 0.16-23.03 | >0.9 |
| **RR/RR vs SS/RS** | 0.05 | 0.005-0.4 | 0.001 | 0.1 | 0.02-0.6 | 0.02 |
| **RS/RS vs SS/SS** | 1.9 | 0.8-4.5 | 0.1 | 4 | 1.6-10.02 | 0.002 |
| **RS/RS vs RR/SS** | / | / | / | 1.7 | 0.19-25.3 | >0.9 |

***Table S5:*** *Combined impact of CYP6P9a and CYP6P9b on the mortality and blood feeding of An. funestus after exposure to various nets in EHT*

| **Interceptor** | | | | | | |
| --- | --- | --- | --- | --- | --- | --- |
|  | **Mortality** | | | **Blood feeding** | | |
|  | **OR** | **CI** | **P-value** | **OR** | **CI** | **P-value** |
| **RR/RR vs RS/RS** | 1.8 | 1.01-3.5 | 0.05 | 4.8 | 2.4-9.6 | <0.0001 |
| **RR/RR vs SS/SS** | 25.04 | 4.06-271.2 | <0.0001 | 2.1 | 0.7-6.3 | 0.2 |
| **RR/RR vs SS/RS** | 25.04 | 4-271.2 | <0.0001 | 21.7 | 3.2-240 | 0.0002 |
| **RS/RS vs SS/SS** | 13.3 | 2.2-145 | 0.002 | 0.4 | 0.1-1.3 | 0.2 |
| **RS/RS vs RS/SS** | 0.9 | 0.05-18.9 | >0.9 | / | / | / |
| **RS/RS vs RR/SS** | / | / | / | 2.2 | 0.1-43.05 | 0.5 |
| **Interceptor G2** | | | | | | |
|  | **OR** | **CI** | **P-value** | **OR** | **CI** | **P-value** |
| **RR/RR vs RS/RS** | 0.50 | 0.2-0.97 | 0.05 | 2.5 | 1.2-5.03 | 0.01 |
| **RR/RR vs SS/SS** | 13.8 | 2.2-151.2 | 0.003 | 1.1 | 0.4-3.2 | 0.8 |
| **RR/RR vs SS/RR** | 1.6 | 0.1-24.5 | >0.9 | 4.9 | 0.6-65.8 | 0.2 |
| **RR/RR vs SS/RS** | 2.4 | 0.6-9.07 | 0.3 | 0.5 | 0.1-1.9 | 0.3 |
| **RS/RS vs SS/SS** | 27.2 | 4.2-290 | <0.0001 | 0.4 | 0.1-1.1 | 0.1 |
| **CFP-100** | | | | | | |
|  | **OR** | **CI** | **P-value** | **OR** | **CI** | **P-value** |
| **RR/RR vs RS/RS** | 0.1 | 0.05-0.3 | <0.0001 | 1.3 | 0.6-2.7 | 0.4 |
| **RR/RR vs SS/SS** | 0.4 | 0.1-1.5 | 0.3 | 0.8 | 0.3-2.1 | 0.7 |
| **RR/RR vs SS/RS** | 0.2 | 0.01-4.8 | 0.3 | 0.2 | 0.02-2.04 | 0.3 |
| **RS/RS vs SS/SS** | 3.02 | 1.03-8.7 | 0.04 | 0.6 | 0.2-1.5 | 0.3 |
| **RS/RS vs RS/SS** | 6.04 | 0.9-74.9 | 0.1 | 0.2 | 0.04-1.2 | 0.1 |
| **RS/RS vs RR/SS** | 0.6 | 0.03-12.8 | >0.9 | 4.9 | 0.7-65.5 | 0.2 |
